# Supplementary material for: Enterococcus faecalis Adapts to Antimicrobial Conjugated Oligoelectrolytes by Lipid Rearrangement and Differential Expression of Membrane Stress Response Genes
Source: PubMed Central journal article supplement (PMC7033496; doi:10.3389/fmicb.2020.00155), 2020-02-14
Supplement: Data_Sheet_1.pdf [file Data_Sheet_1.pdf]

*Supplementary Material*

**Supplementary Table S1. Minimum Inhibitory Concentrations (MIC) for wild type and transposon mutants of genes mutated in EFC3Py.**

| <b>Gene Tag</b>             | <b>Locus</b> | <b>Gene Product</b>                                                     | <b>Position</b> | <b>Insertion sites</b>                  | <b>MIC of DAP (μM)</b> |
|-----------------------------|--------------|-------------------------------------------------------------------------|-----------------|-----------------------------------------|------------------------|
| <i>E. faecalis</i><br>OG1RF | -            | -                                                                       | -               | -                                       | 1.23                   |
| OG1RF_11765                 |              | MerR family transcriptional regulator                                   | 1853415         | 295 nt (Position) /768 nt (Gene length) | 1.23                   |
| OG1RF_11766                 |              | Multidrug ABC superfamily ATP binding cassette transporter, ABC protein | 1855237         | 1414 nt /1728 nt                        | 1.23                   |
| OG1RF_11767                 |              | ABC superfamily ATP binding cassette transporter, membrane protein      | 1855713         | 110 nt/1779 nt                          | 1.23                   |
| OG1RF_11462                 |              | Membrane protein of hypothetical function, adjacent to PspC             | 1523233         | 133 nt/357 nt                           | 1.23                   |

**Supplementary Table S2. List of genes differentially expressed in *E. faecalis* OG1RF wild type upon treatment with COE1-3C.**

| <b>Locus</b>                 | <b>Description</b>                            | <b>Fold change</b> |
|------------------------------|-----------------------------------------------|--------------------|
| <b>OG1RF_10301</b>           | RND transporter                               | -5.0               |
| <b>OG1RF_10302</b>           | ABC transporter ATP-binding protein           | -5.0               |
| <b>OG1RF_10303</b>           | ABC transporter permease                      | -5.0               |
| <b>OG1RF_10878</b>           | adhesin                                       | 5.4                |
| <b>OG1RF_11260</b>           | membrane protein                              | 7.5                |
| <b>OG1RF_11384</b>           | permease                                      | -5.5               |
| <b>OG1RF_11385</b>           | peptide ABC transporter ATP-binding protein   | -6.2               |
| <b>OG1RF_11462</b>           | membrane protein                              | -4.8               |
| <b>OG1RF_11463</b>           | PspC family transcriptional regulator         | -4.9               |
| <b>OG1RF_12269</b>           | RND transporter                               | -9.9               |
| <b>OG1RF_11185</b>           | molybdenum cofactor biosynthesis protein MoaB | -8.5               |
| <b>OG1RF_10527</b>           | peptide ABC transporter ATP-binding protein   | -7.5               |
| <b>OG1RF_12267</b>           | permease                                      | -6.2               |
| <b>OG1RF_12268</b>           | ABC transporter ATP-binding protein           | -5.8               |
| <b>Signal Transduction</b>   |                                               |                    |
| <b>OG1RF_11656</b>           | peptide ABC transporter permease              | -7.3               |
| <b>OG1RF_11657</b>           | ABC transporter ATP-binding protein           | -5.4               |
| <b>Hypothetical Proteins</b> |                                               |                    |
| <b>OG1RF_10304</b>           | hypothetical protein                          | -15.3              |
| <b>OG1RF_10353</b>           | hypothetical protein                          | -7.0               |
| <b>OG1RF_10354</b>           | hypothetical protein                          | -8.1               |
| <b>OG1RF_10531</b>           | hypothetical protein                          | -7.6               |
| <b>OG1RF_10532</b>           | hypothetical protein                          | -7.1               |
| <b>OG1RF_11751</b>           | hypothetical protein                          | -4.3               |
| <b>OG1RF_10659</b>           | hypothetical protein                          | -4.2               |
| <b>OG1RF_11252</b>           | hypothetical protein                          | -4.7               |
| <b>OG1RF_11464</b>           | hypothetical protein                          | -4.0               |

**Supplementary Table S3.** List of genes differentially expressed in *E. faecalis* OG1RF wild type on treatment with COE1-3Py.

| <b>Locus</b>                   | <b>Name</b>                                   | <b>Fold change</b> |
|--------------------------------|-----------------------------------------------|--------------------|
| <b>OG1RF_10288</b>             | sodium:proton antiporter                      | 4.7                |
| <b>OG1RF_10367</b>             | decarboxylase                                 | 14.2               |
| <b>OG1RF_10369</b>             | sodium:proton antiporter                      | 8.1                |
| <b>OG1RF_10526</b>             | permease                                      | -6.1               |
| <b>OG1RF_11227</b>             | mandelate racemase                            | -6.3               |
| <b>OG1RF_11810</b>             | transporter                                   | 7.9                |
| <b>Overview</b>                |                                               |                    |
| <b>OG1RF_11314</b>             | katA; catalase                                | 6.7                |
| <b>Hypothetical protein</b>    |                                               |                    |
| <b>OG1RF_10075</b>             | hypothetical protein                          | -4.0               |
| <b>OG1RF_12152</b>             | hypothetical protein                          | 4.4                |
| <b>OG1RF_10659</b>             | hypothetical protein                          | -4.2               |
| <b>OG1RF_11252</b>             | hypothetical protein                          | -4.7               |
| <b>OG1RF_11464</b>             | hypothetical protein                          | -4.0               |
| <b>Nucleotide metabolism</b>   |                                               |                    |
| <b>OG1RF_12279</b>             | allantoinase                                  | -6.5               |
| <b>Cellular communication</b>  |                                               |                    |
| <b>OG1RF_10368</b>             | amino acid permease                           | 20.4               |
| <b>Carbohydrate metabolism</b> |                                               |                    |
| <b>OG1RF_10682</b>             | beta-phosphoglucomutase                       | -5.6               |
| <b>Signal transduction</b>     |                                               |                    |
| <b>OG1RF_11938</b>             | fumarate reductase flavoprotein subunit       | 4.2                |
| <b>OG1RF_11185</b>             | molybdenum cofactor biosynthesis protein MoaB | -8.5               |
| <b>OG1RF_10527</b>             | peptide ABC transporter ATP-binding protein   | -7.5               |
| <b>OG1RF_12267</b>             | permease                                      | -6.2               |
| <b>OG1RF_12268</b>             | ABC transporter ATP-binding protein           | -5.8               |

**Supplementary Table S4.** List of genes differentially expressed that were common to both EFC3C and EFC3Py in comparison to the wild type in the absence of COEs.

| <b>Locus</b>       | <b>Description</b>                           | <b>Fold change in EFC3Py</b> | <b>Fold change in EFC3C</b> |
|--------------------|----------------------------------------------|------------------------------|-----------------------------|
| <b>OG1RF_12235</b> | protease                                     | 12.8                         | 8.0                         |
| <b>OG1RF_11260</b> | membrane protein                             | 4.7                          | 5.4                         |
| <b>OG1RF_11377</b> | conjugal transfer protein TraX               | -11.9                        | -4.4                        |
| <b>OG1RF_10654</b> | two-component system sensor histidine kinase | -10.4                        | -4.4                        |
| <b>OG1RF_10707</b> | DNA repair exonuclease                       | -12.8                        | -4.5                        |
| <b>OG1RF_11074</b> | magnesium-translocating P-type ATPase        | -17.3                        | -4.7                        |
| <b>OG1RF_11072</b> | transcriptional regulator                    | -16.3                        | -5.1                        |
| <b>OG1RF_10328</b> | peptidase M23                                | -10.1                        | -5.2                        |
| <b>OG1RF_11073</b> | LysR family transcriptional regulator        | -15.5                        | -5.3                        |
| <b>OG1RF_12496</b> | DNA-binding protein                          | -12.9                        | -5.4                        |
| <b>OG1RF_12131</b> | membrane protein                             | -10.5                        | -5.8                        |
| <b>OG1RF_11569</b> | membrane protein                             | -11.6                        | -5.8                        |
| <b>OG1RF_10481</b> | serine hydrolase                             | -12.8                        | -6.7                        |
| <b>OG1RF_12298</b> | DNA-binding protein                          | -8.4                         | -7.4                        |
| <b>OG1RF_11094</b> | membrane protein                             | -7.4                         | -8.0                        |
| <b>OG1RF_12067</b> | tellurite resistance protein                 | -19.2                        | -8.0                        |
| <b>OG1RF_11522</b> | multidrug MFS transporter                    | -28.9                        | -9.2                        |
| <b>OG1RF_12500</b> | LytR family transcriptional regulator        | -33.0                        | -10.8                       |
| <b>OG1RF_10301</b> | RND transporter                              | -11.1                        | -14.1                       |
| <b>OG1RF_10302</b> | ABC transporter ATP-binding protein          | -11.4                        | -14.2                       |
| <b>OG1RF_10303</b> | ABC transporter permease                     | -11.0                        | -14.7                       |
| <b>OG1RF_11385</b> | peptide ABC transporter ATP-binding protein  | -79.5                        | -24.3                       |
| <b>OG1RF_11384</b> | permease                                     | -67.6                        | -24.3                       |
| <b>OG1RF_12269</b> | RND transporter                              | -94.3                        | -27.8                       |
| <b>OG1RF_11462</b> | membrane protein                             | -92.2                        | -28.5                       |
| <b>OG1RF_12268</b> | ABC transporter ATP-binding protein          | -115.3                       | -31.4                       |
| <b>OG1RF_11463</b> | PspC family transcriptional regulator        | -102.7                       | -32.3                       |
| <b>OG1RF_12267</b> | permease                                     | -139.9                       | -39.9                       |
|                    | <b>Amino acid metabolism</b>                 |                              |                             |
| <b>OG1RF_10473</b> | amidase                                      | -16.4                        | -6.3                        |
|                    | <b>Carbohydrate metabolism</b>               |                              |                             |
| <b>OG1RF_11199</b> | diacetylchitobiose-6-phosphate hydrolase     | -12.8                        | -5.2                        |
|                    | <b>Glycan biosynthesis and metabolism</b>    |                              |                             |
| <b>OG1RF_10417</b> | penicillin-binding protein 1A                | -15.0                        | -4.4                        |

| <b>Lipid metabolism</b>                |                                                      |        |        |
|----------------------------------------|------------------------------------------------------|--------|--------|
| OG1RF_11521                            | alkaline phosphatase                                 | -18.9  | -4.4   |
| OG1RF_11570                            | glycerophosphoryl diester phosphodiesterase          | -12.5  | -7.1   |
| <b>Membrane transport</b>              |                                                      |        |        |
| OG1RF_12351                            | iron ABC transporter substrate-binding protein       | 4.9    | 4.9    |
| <b>Metabolism of other amino acids</b> |                                                      |        |        |
| OG1RF_12112                            | D-alanine--poly(phosphoribitol) ligase subunit 1     | -13.2  | -6.0   |
| OG1RF_12110                            | D-alanine--poly(phosphoribitol) ligase subunit 2     | -13.9  | -6.4   |
| <b>Signal transduction</b>             |                                                      |        |        |
| OG1RF_12212                            | two-component system sensor histidine kinase         | -10.3  | -4.9   |
| OG1RF_12211                            | LuxR family transcriptional regulator                | -9.4   | -5.3   |
| OG1RF_12111                            | D-alanyl-lipoteichoic acid biosynthesis protein DltB | -13.9  | -6.1   |
| OG1RF_12109                            | D-alanyl transfer protein DltD                       | -14.7  | -6.6   |
| OG1RF_11657                            | ABC transporter ATP-binding protein                  | -24.2  | -10.8  |
| OG1RF_11656                            | peptide ABC transporter permease                     | -33.6  | -12.8  |
| <b>Translation</b>                     |                                                      |        |        |
| OG1RF_10057                            | peptide ABC transporter substrate-binding protein    | 12.0   | 6.7    |
| <b>Hypothetical Protein</b>            |                                                      |        |        |
| OG1RF_10492                            | hypothetical protein                                 | 8.1    | 4.0    |
| OG1RF_11239                            | hypothetical protein                                 | -8.9   | -4.6   |
| OG1RF_12328                            | hypothetical protein                                 | -8.2   | -4.7   |
| OG1RF_10305                            | hypothetical protein                                 | -7.6   | -5.7   |
| OG1RF_11093                            | hypothetical protein                                 | -7.2   | -7.4   |
| OG1RF_11031                            | hypothetical protein                                 | -14.2  | -7.7   |
| OG1RF_11032                            | hypothetical protein                                 | -13.9  | -8.0   |
| OG1RF_10354                            | hypothetical protein                                 | -8.6   | -8.7   |
| OG1RF_11751                            | hypothetical protein                                 | -18.0  | -8.9   |
| OG1RF_10353                            | hypothetical protein                                 | -11.1  | -10.3  |
| OG1RF_11200                            | hypothetical protein                                 | -32.9  | -12.7  |
| OG1RF_12066                            | hypothetical protein                                 | -38.9  | -13.8  |
| OG1RF_10659                            | hypothetical protein                                 | -56.6  | -24.0  |
| OG1RF_10304                            | hypothetical protein                                 | -33.0  | -25.0  |
| OG1RF_10532                            | hypothetical protein                                 | -71.9  | -53.7  |
| OG1RF_10531                            | hypothetical protein                                 | -73.9  | -56.2  |
| OG1RF_11464                            | hypothetical protein                                 | -215.7 | -64.2  |
| OG1RF_11252                            | hypothetical protein                                 | -590.3 | -195.0 |

**Supplementary Table S5.** Genes up- or downregulated only in the untreated mutant EFC3C compared to untreated *E. faecalis* wild type.

| <b>Locus</b>                   | <b>Description</b>                                    | <b>Fold change<br/>in EFC3C</b> |
|--------------------------------|-------------------------------------------------------|---------------------------------|
| <b>Membrane transport</b>      |                                                       |                                 |
| OG1RF_12353                    | iron ABC transporter permease                         | 6.4                             |
| OG1RF_10136                    | ferrichrome ABC transporter substrate-binding protein | 4.2                             |
| <b>Carbohydrate metabolism</b> |                                                       |                                 |
| OG1RF_11753                    | PTS maltose transporter subunit IIBC                  | -4.3                            |

**Supplementary Table S6.** Genes up- or downregulated only in the untreated mutant EFC3Py compared to the untreated *E. faecalis* wild type.

| <b>Locus</b> | <b>Description</b>                                        | <b>Fold Change in EFC3Py</b> |
|--------------|-----------------------------------------------------------|------------------------------|
| OG1RF_12481  | choline-binding protein                                   | 11.1                         |
| OG1RF_10490  | cell wall surface anchor protein                          | 6.6                          |
| OG1RF_10485  | cell wall surface anchor protein                          | 5.0                          |
| OG1RF_10486  | cell surface protein                                      | 4.6                          |
| OG1RF_10407  | CRISPR-associated protein Csn2                            | 4.3                          |
| OG1RF_12572  | citrate transporter                                       | 4.2                          |
| OG1RF_10487  | cell surface protein                                      | 4.1                          |
| OG1RF_10655  | glucose transporter GlcU                                  | -4.1                         |
| OG1RF_10836  | nitrate ABC transporter permease                          | -4.1                         |
| OG1RF_10835  | taurine ABC transporter ATP-binding protein               | -4.6                         |
| OG1RF_11036  | ATPase P                                                  | -4.8                         |
| OG1RF_11077  | co-chaperone GrpE                                         | -4.8                         |
| OG1RF_11383  | NADPH:quinone reductase                                   | -4.8                         |
| OG1RF_10516  | acyltransferase                                           | -5.3                         |
| OG1RF_10761  | alpha/beta hydrolase                                      | -5.3                         |
| OG1RF_11076  | HrcA family transcriptional regulator                     | -5.3                         |
| OG1RF_10996  | Cro/CI family transcriptional regulator                   | -5.5                         |
| OG1RF_12210  | potassium transporter Trk                                 | -6.1                         |
| OG1RF_12536  | two-component system sensor histidine kinase              | -6.9                         |
| OG1RF_12535  | two-component system response regulator                   | -7.5                         |
| OG1RF_11452  | ABC transporter substrate-binding protein                 | -7.9                         |
| OG1RF_12071  | transcriptional regulator                                 | -8.3                         |
| OG1RF_12213  | membrane protein                                          | -9.0                         |
| OG1RF_10653  | two-component system response regulator                   | -9.3                         |
| OG1RF_11908  | virion core protein                                       | -9.5                         |
| OG1RF_11793  | chaperone protein ClpB                                    | -10.4                        |
| OG1RF_11070  | cell division protein FtsW                                | -11.8                        |
| OG1RF_11002  | phosphoesterase                                           | -12.6                        |
| OG1RF_11071  | cell division protein FtsW                                | -17.8                        |
|              | <b>Carbohydrate metabolism</b>                            |                              |
| OG1RF_10297  | mannitol-specific phosphotransferase enzyme IIA component | -4.6                         |
| OG1RF_10432  | PTS fructose transporter subunit IIC                      | -4.6                         |
| OG1RF_10434  | tagatose 1,6-diphosphate aldolase                         | -5.5                         |

---

|                    |                                                                 |       |
|--------------------|-----------------------------------------------------------------|-------|
| <b>OG1RF_10298</b> | mannitol-1-phosphate 5-dehydrogenase                            | -5.6  |
| <b>OG1RF_10682</b> | beta-phosphoglucomutase                                         | -6.1  |
|                    | <b>Cellular communication</b>                                   |       |
| <b>OG1RF_10993</b> | spermidine/putrescine ABC transporter substrate-binding protein | 5.6   |
| <b>OG1RF_12366</b> | peptide ABC transporter substrate-binding protein               | 5.5   |
| <b>OG1RF_10991</b> | spermidine/putrescine ABC transporter permease                  | 5.1   |
|                    | <b>Folding, sorting and degradation</b>                         |       |
| <b>OG1RF_10584</b> | signal peptidase I                                              | 6.5   |
| <b>OG1RF_11078</b> | molecular chaperone DnaK                                        | -4.7  |
|                    | <b>Glycan biosynthesis and metabolism</b>                       |       |
| <b>OG1RF_12158</b> | cell division protein FtsI                                      | -4.1  |
|                    | <b>Membrane transport</b>                                       |       |
| <b>OG1RF_10897</b> | glutamine ABC transporter substrate-binding protein             | 11.5  |
| <b>OG1RF_10895</b> | amino acid ABC transporter permease                             | 9.6   |
| <b>OG1RF_10896</b> | glutamine ABC transporter permease                              | 9.0   |
| <b>OG1RF_10898</b> | ABC transporter ATP-binding protein                             | 8.4   |
|                    | <b>Nucleotide metabolism</b>                                    |       |
| <b>OG1RF_10994</b> | adenine deaminase                                               | 4.3   |
|                    | <b>Signal transduction</b>                                      |       |
| <b>OG1RF_10760</b> | membrane protein                                                | -6.2  |
|                    | <b>Translation</b>                                              |       |
| <b>OG1RF_10025</b> | RpiR family transcriptional regulator                           | 5.1   |
|                    | <b>Hypothetical protein</b>                                     |       |
| <b>OG1RF_10796</b> | hypothetical protein                                            | 8.7   |
| <b>OG1RF_12152</b> | hypothetical protein                                            | 7.9   |
|                    | hypothetical protein                                            | 5.8   |
| <b>OG1RF_10491</b> | hypothetical protein                                            | 5.8   |
| <b>OG1RF_10860</b> | hypothetical protein                                            | 4.4   |
| <b>OG1RF_10861</b> | hypothetical protein                                            | 4.1   |
| <b>OG1RF_10482</b> | hypothetical protein                                            | -4.6  |
| <b>OG1RF_12166</b> | hypothetical protein                                            | -5.1  |
| <b>OG1RF_10445</b> | hypothetical protein                                            | -5.2  |
| <b>OG1RF_11254</b> | hypothetical protein                                            | -5.5  |
| <b>OG1RF_10446</b> | hypothetical protein                                            | -7.4  |
| <b>OG1RF_11910</b> | hypothetical protein                                            | -8.5  |
| <b>OG1RF_11909</b> | hypothetical protein                                            | -9.6  |
| <b>OG1RF_12471</b> | hypothetical protein                                            | -10.4 |

---



| <b>Locus</b>                  | <b>Description</b>                                        | <b>Fold change in EFC3Py</b> |
|-------------------------------|-----------------------------------------------------------|------------------------------|
| OG1RF_10838                   | manganese transporter                                     | -5.9                         |
| OG1RF_10605                   | aldo/keto reductase                                       | -4.3                         |
| OG1RF_11643                   | universal stress protein UspA                             | -4.1                         |
| OG1RF_12470                   | cobalamin synthesis protein CobW                          | 4.1                          |
| OG1RF_10878                   | adhesin                                                   | 4.4                          |
| OG1RF_11522                   | multidrug MFS transporter                                 | 4.6                          |
| OG1RF_10589                   | cation transporter                                        | 5.6                          |
| OG1RF_10328                   | peptidase M23                                             | 6.3                          |
| OG1RF_11002                   | phosphoesterase                                           | 6.6                          |
| OG1RF_11377                   | conjugal transfer protein TraX                            | 6.7                          |
| OG1RF_10550                   | polysaccharide lyase                                      | 9.5                          |
| OG1RF_11767                   | multidrug ABC transporter ATP-binding protein             | 699.5                        |
| OG1RF_11766                   | multidrug ABC transporter ATP-binding protein             | 787.2                        |
| <b>Cellular communication</b> |                                                           |                              |
| OG1RF_12368                   | peptide ABC transporter permease                          | -5.2                         |
| OG1RF_12367                   | peptide ABC transporter permease                          | -4.8                         |
| OG1RF_12369                   | peptide ABC transporter ATP-binding protein               | -4.6                         |
| OG1RF_12366                   | peptide ABC transporter substrate-binding protein         | -4.1                         |
| <b>Membrane transport</b>     |                                                           |                              |
| OG1RF_11677                   | ABC transporter ATP-binding protein                       | -8.6                         |
| OG1RF_11678                   | membrane protein                                          | -7.3                         |
| OG1RF_10684                   | PTS glucose transporter subunit IIABC                     | -7.1                         |
| OG1RF_10297                   | mannitol-specific phosphotransferase enzyme IIA component | -6.1                         |
| OG1RF_11679                   | manganese ABC transporter substrate-binding protein       | -5.6                         |
| OG1RF_12479                   | PTS mannose transporter subunit IID                       | -4.7                         |
| OG1RF_12472                   | zinc-binding protein                                      | 4.8                          |
| OG1RF_12353                   | iron ABC transporter permease                             | 5.9                          |
| OG1RF_12354                   | iron ABC transporter permease                             | 6.0                          |
| OG1RF_12351                   | iron ABC transporter substrate-binding protein            | 8.0                          |
| OG1RF_10137                   | ferrichrome ABC transporter ATP-binding protein           | 8.1                          |
| OG1RF_12352                   | iron ABC transporter ATP-binding protein                  | 8.4                          |
| OG1RF_10136                   | ferrichrome ABC transporter substrate-binding protein     | 13.4                         |
| <b>Translation</b>            |                                                           |                              |
| OG1RF_10021                   | PTS mannose transporter subunit IID                       | -4.4                         |
| OG1RF_10020                   | PTS alpha-glucoside transporter subunit IIBC              | -4.3                         |
| OG1RF_12469                   | 50S ribosomal protein L33                                 | 4.3                          |
| OG1RF_10881                   | Hypothetical protein                                      | 20.5                         |

**Supplementary Table S7.** Differential expression of genes EFC3C treated with COE1-3Py in comparison to the untreated strain.

| <b>Locus</b>                  | <b>Description</b>                                              | <b>Fold change in EFC3C</b> |
|-------------------------------|-----------------------------------------------------------------|-----------------------------|
| <b>OG1RF_12420</b>            | large-conductance mechanosensitive channel                      | -3.6                        |
| <b>Cellular communication</b> |                                                                 |                             |
| <b>OG1RF_10993</b>            | spermidine/putrescine ABC transporter substrate-binding protein | 4.8                         |
| <b>OG1RF_10434</b>            | tagatose 1,6-diphosphate aldolase                               | 5.1                         |
| <b>Membrane transport</b>     |                                                                 |                             |
| <b>OG1RF_11677</b>            | ABC transporter ATP-binding protein                             | -7.8                        |
| <b>OG1RF_10432</b>            | PTS fructose transporter subunit IIC                            | 5.5                         |

**Supplementary Table S8.** Differential expression of genes EFC3Py treated with COE1-3C in comparison to the untreated EFC3Py.

| <b>Locus</b>       | <b>Description</b>                            | <b>Fold change in EFC3Py</b> |
|--------------------|-----------------------------------------------|------------------------------|
| <b>OG1RF_11766</b> | multidrug ABC transporter ATP-binding protein | 28.3                         |
| <b>OG1RF_11767</b> | multidrug ABC transporter ATP-binding protein | 27.4                         |

**Supplementary Table S9. List of primers used to construct the plasmids and verify knockout strains.**

| <b>Primers</b>        | <b>Sequence</b>                                                                                         | <b>Description</b>                                                                                |
|-----------------------|---------------------------------------------------------------------------------------------------------|---------------------------------------------------------------------------------------------------|
| <i>liaF_INF_F</i>     | gatatctgcagaattcccgaagccgac<br>cattt                                                                    | Primer used during PCR<br>amplification of <i>liaF</i> from EFC3C.                                |
| <i>liaF_INF_R</i>     | taccgagctcggatccatattggttcagg<br>agtttctgt                                                              | Primer used during PCR<br>amplification of <i>liaF</i> from EFC3C.                                |
| <i>liaR_INF_F</i>     | gatatctgcagaattcgagaacgtgttgt<br>cggc                                                                   | Primer used during PCR<br>amplification of <i>liaR</i> from EFC3Py.                               |
| <i>liaR_INF_R</i>     | tgattacgccaagctctgccgcaaac<br>gtcct                                                                     | Primer used during PCR<br>amplification of <i>liaR</i> from EFC3Py.                               |
| <i>liaFcomp_INF_F</i> | gcttgatatcgaatttaggcgaccaagt<br>gattat                                                                  | Primer used during PCR<br>amplification of <i>liaF</i> from OG1RF.                                |
| <i>liaFcomp_INF_R</i> | tagaactagtgatctcaagcataatctg<br>gaacatcatatggataagcgtaatctgg<br>aacatcgtatgggtatacacggatcacc<br>tcaac   | Primer used during PCR<br>amplification of <i>liaF</i> from OG1RF.                                |
| <i>liaRcomp_INF_F</i> | gtgaggaaactgaattcgtgatcaaagta<br>atgtagtgatgacc                                                         | Primer used during PCR<br>amplification of <i>liaR</i> from<br>OG1RF.& to check gene insertion    |
| <i>liaRcomp_INF_R</i> | acctgttgaatgatctgcagttaagcata<br>atctggaacatcatatggataagcgtaat<br>ctggaacatcgtatgggtatttgctaaa<br>ccatg | Primer used during PCR<br>amplification of <i>liaR</i> from OG1RF<br>and to check gene insertion. |
| <b>M13F(-20)</b>      | gtaaacgacggccagt                                                                                        | Forward primer to check insertion in<br>pGCP123                                                   |
| <b>M13F(-40)</b>      | gtttcccagtcacgac                                                                                        | Forward primer to check insertion in<br>pGCP213                                                   |
| <b>M13R-pUC (-26)</b> | caggaaacagctatgac                                                                                       | Reverse primer to check insertion in<br>pGCP213 & pGCP123                                         |

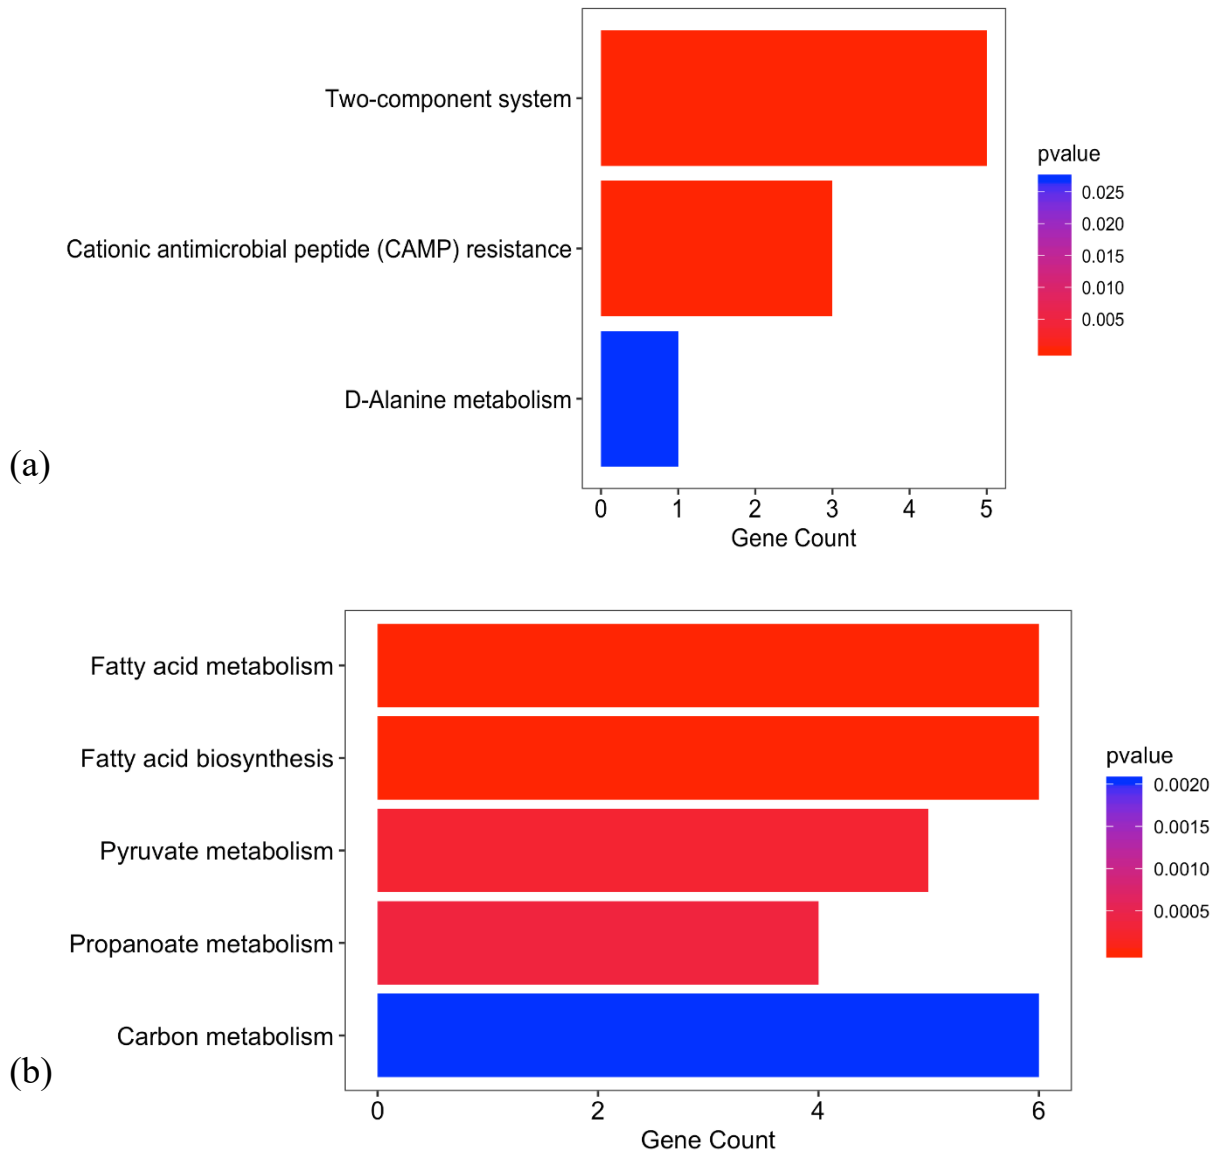

**Supplementary Figure S1.** Bar plot depicting the most enriched KEGG pathways on treatment of wild type OG1RF with (a) COE1-3C and (b) COE1-3Py. The colours of the bar chart represent the p value of the enriched KEGG pathway. Height represent the gene count.

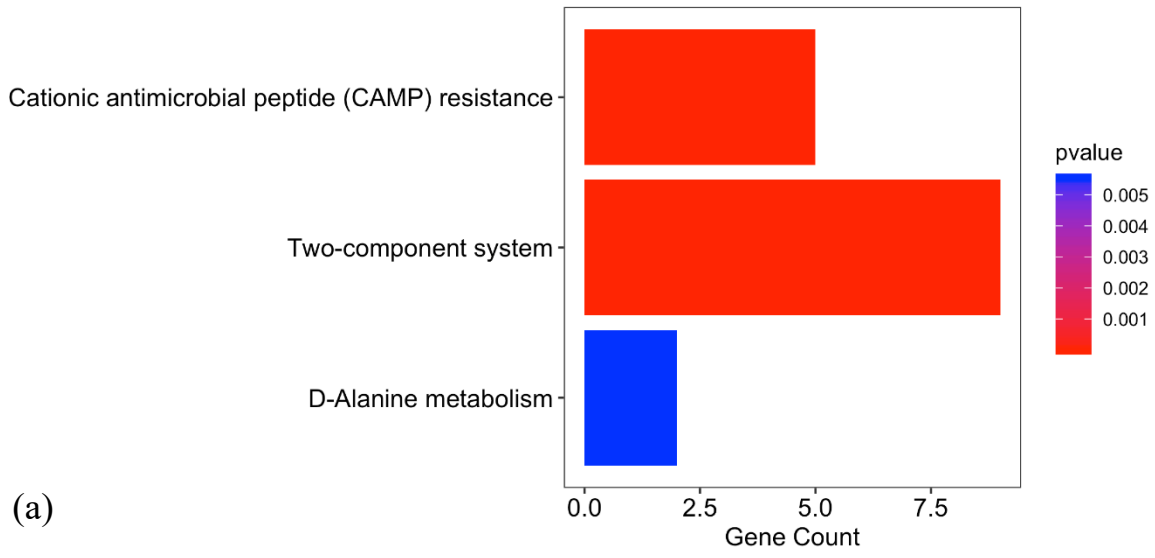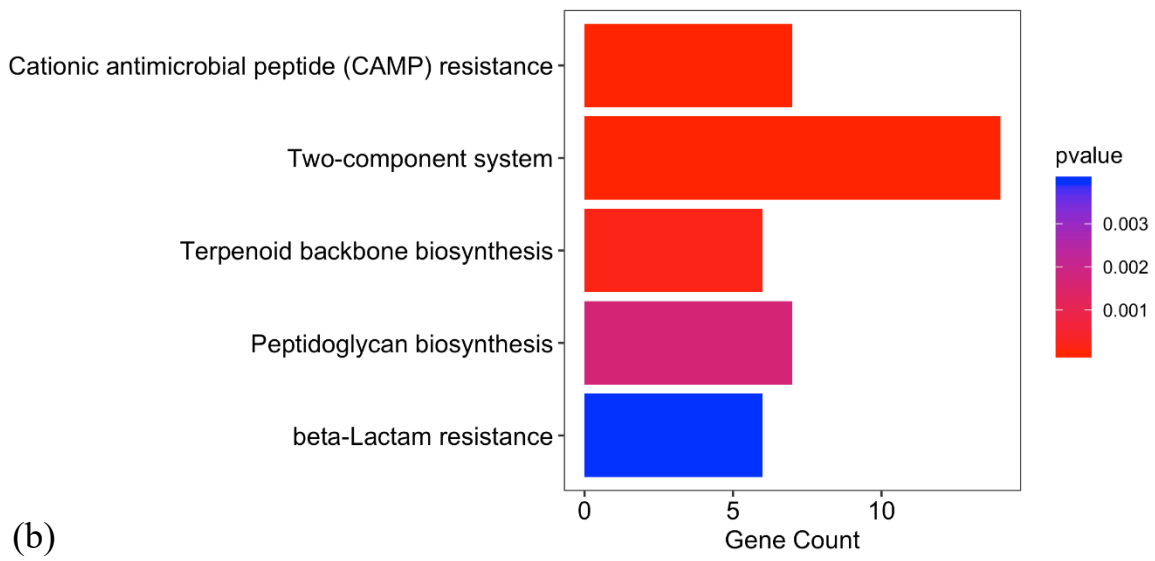

**Supplementary Figure S2.** Bar plot depicting the most enriched KEGG pathways on treatment of wild type OG1RF with (a) EFC3C and (b) EFC3Py. The colours of the bar chart represent the p value of the enriched KEGG pathway. Height represent the gene count.

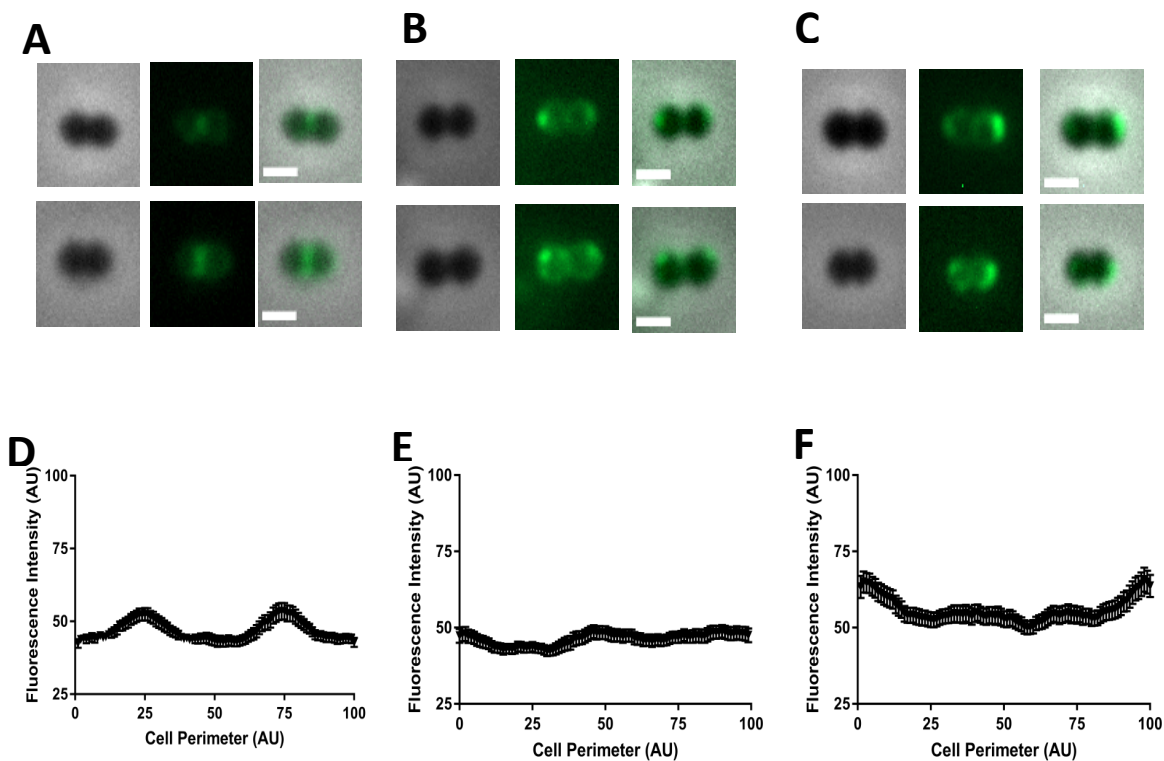

**Supplementary Figure S3.** Representative images of localization patterns of COE1-3Py in (A&D) *Enterococcus faecalis* OG1RF wild type, (B&E) EFC3C and (C&F) EFC3Py strains. Fluorescence intensity along the circumference of the cell was plotted against the cell perimeter of 1 to 100 units to generate a fluorescence distribution profile. Intensity analysis performed by PSICIC analysis software for two independent experiments with duplicates in each experiment. Excitation and emission wavelengths were 515/640 nm, respectively. The scale bar represents 0.5  $\mu\text{m}$ .

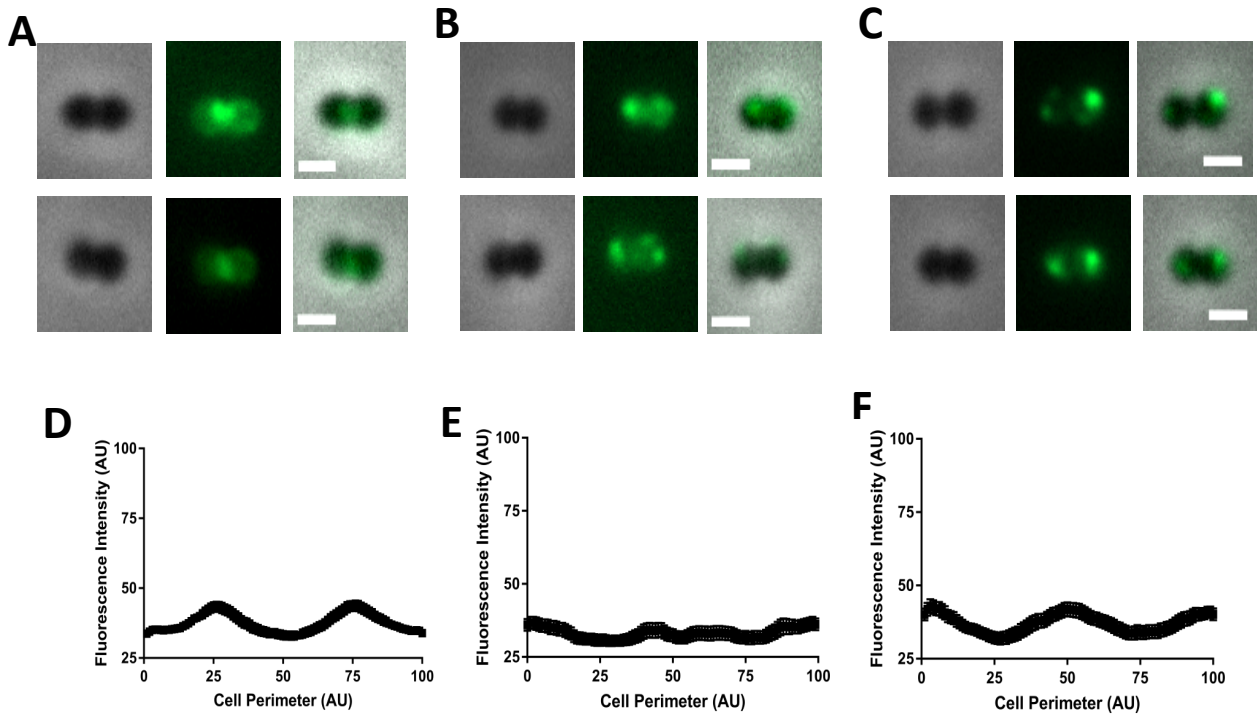

**Supplementary Figure S4.** Representative images of localization patterns of COE1-3C in (A&D) *Enterococcus faecalis* OG1RF wild type, (B&E) EFC3C and (C&F) EFC3Py strains. Fluorescence intensity along the circumference of the cell was plotted against the cell perimeter of 1 to 100 units to generate a fluorescence distribution profile. Intensity analysis performed by PSICIC analysis software for two independent experiments with duplicates in each experiment. Excitation and emission wavelengths were 515/640 nm, respectively. The scale bar represents 0.5  $\mu\text{m}$ .

(A)

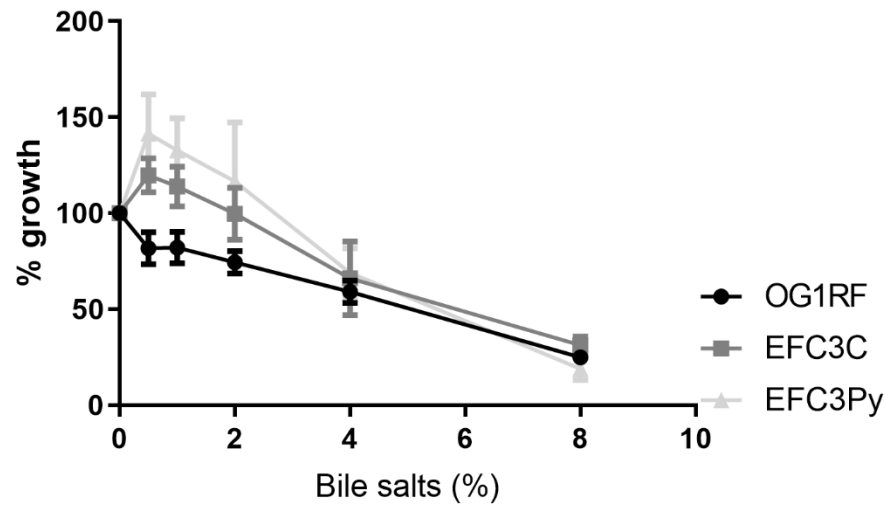

(B)

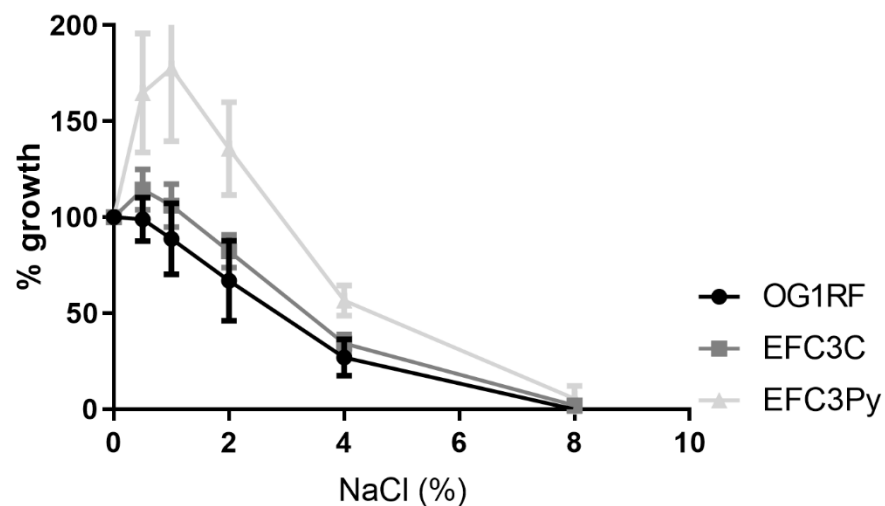

**Supplementary Figure S5.** Characterization of sodium chloride and bile salts tolerance in EFC3C, EFC3PY and OG1RF wild type. The effect of different concentrations of bile salts (0, 0.5%, 1%, 2%, 4% and 8%) or sodium chloride (0, 0.5%, 1%, 2%, 4% and 8%) was plotted as the % growth against the concentrations of bile salts or sodium chloride (NaCl). This error bars indicate the standard deviations of three biological replicates and three technical replicates (n =9). % growth = (OD<sub>600</sub> measured at 7 h/ OD<sub>600</sub> measured at 0 h) x 100. The error bars represent the standard deviation.
